# Supplementary material for: Chemical epigenetic modification uncovers new isocoumarins from the endophyte Dothideomycetes sp. BMC-101
Source: Royal Society of Chemistry journal article supplement (doi:10.1039/d6ra02544g), 2026-05-29
Supplement: d6ra02544g1.pdf [file d6ra02544g1.pdf]

# Chemical Epigenetic Modification Uncovers New Isocoumarins from the Endophyte *Dothideomyces* sp. BMC-101

Yajuan Cong <sup>1,†</sup>, Haotian Wang <sup>1,2,†</sup>, Hong Wang <sup>1</sup>, Jing Jiang <sup>1</sup>, Lanying Li <sup>1</sup>, Runyu Wu <sup>1</sup>,  
Yixuan Zhang <sup>1</sup>, Qiang Huo <sup>1,\*</sup> and Meilin Zhu <sup>1,2,\*</sup>

<sup>1</sup> School of Pharmacy, Bengbu Medical College, 2600 Donghai Avenue, Bengbu 233030, Anhui, China;

<sup>2</sup> Anhui Engineering Technology Research Center of Biochemical Pharmaceutical, Bengbu Medical University, 2600 Donghai Avenue, Bengbu 233030, Anhui, China

\*Correspondence: 620793985@qq.com (Q.H.); meilin0402@bbmu.edu.cn (M.Z.)

† These authors contributed equally to this work.

## List of Supplementary Information

|                                                                                                                                                                                                   |    |
|---------------------------------------------------------------------------------------------------------------------------------------------------------------------------------------------------|----|
| <b>Figure S1.</b> HPLC analysis of the crude extracts of the fungus <i>Dothideomyces</i> sp. BMC-101 using the OSMAC strategy. ....                                                               | 4  |
| <b>Figure S2.</b> Chiral separations of compounds <b>1</b> and <b>2</b> .....                                                                                                                     | 5  |
| <b>Figure S3.</b> Conformations of lowest-energy conformers (>5% population) of (3R, 2'S)-1 ( <b>1a</b> ).5                                                                                       |    |
| <b>Figure S4.</b> HRESIMS spectrum of (±)-deothideomarin A ( <b>1</b> ) .....                                                                                                                     | 6  |
| <b>Figure S5.</b> <sup>1</sup> H NMR (600 MHz, DMSO- <i>d</i> <sub>6</sub> ) spectrum of (±)-deothideomarin A ( <b>1</b> ) .....                                                                  | 6  |
| <b>Figure S6.</b> <sup>13</sup> C NMR (150 MHz, DMSO- <i>d</i> <sub>6</sub> ) spectrum of (±)-deothideomarin A ( <b>1</b> ).....                                                                  | 7  |
| <b>Figure S7.</b> <sup>1</sup> H- <sup>1</sup> H COSY spectrum of (±)-deothideomarin A ( <b>1</b> ).....                                                                                          | 7  |
| <b>Figure S8.</b> HSQC spectrum of (±)-deothideomarin A ( <b>1</b> ).....                                                                                                                         | 8  |
| <b>Figure S9.</b> HMBC spectrum of (±)-deothideomarin A ( <b>1</b> ).....                                                                                                                         | 8  |
| <b>Figure S10.</b> NOESY spectrum of (±)-deothideomarin A ( <b>1</b> ).....                                                                                                                       | 9  |
| <b>Figure S11.</b> Key HMBC, COSY, correlations of (±)-deothideomarin A ( <b>1</b> ).....                                                                                                         | 9  |
| <b>Figure S12.</b> HRESIMS spectrum of (±)-deothideomarin B ( <b>2</b> ) .....                                                                                                                    | 10 |
| <b>Figure S13.</b> <sup>1</sup> H NMR (600 MHz, CDCl <sub>3</sub> ) spectrum of (±)-deothideomarin B ( <b>2</b> ).....                                                                            | 10 |
| <b>Figure S14.</b> <sup>13</sup> C NMR (150 MHz, CDCl <sub>3</sub> ) spectrum of (±)-deothideomarin B ( <b>2</b> ).....                                                                           | 11 |
| <b>Figure S15.</b> <sup>1</sup> H- <sup>1</sup> H COSY spectrum of (±)-deothideomarin B ( <b>2</b> ).....                                                                                         | 11 |
| <b>Figure S16.</b> HSQC spectrum of (±)-deothideomarin B ( <b>2</b> ).....                                                                                                                        | 12 |
| <b>Figure S17.</b> HMBC spectrum of (±)-deothideomarin B ( <b>2</b> ).....                                                                                                                        | 12 |
| <b>Figure S18.</b> Key HMBC, COSY, correlations of (±)-deothideomarin B ( <b>2</b> ).....                                                                                                         | 13 |
| <b>Figure S19.</b> HRESIMS spectrum of deothideomarin C ( <b>3</b> ) .....                                                                                                                        | 13 |
| <b>Figure S20.</b> <sup>1</sup> H NMR (500 MHz, DMSO- <i>d</i> <sub>6</sub> ) spectrum of deothideomarin C ( <b>3</b> ) .....                                                                     | 14 |
| <b>Figure S21.</b> <sup>13</sup> C NMR (125 MHz, DMSO- <i>d</i> <sub>6</sub> ) spectrum of deothideomarin C ( <b>3</b> ) .....                                                                    | 14 |
| <b>Figure S22.</b> <sup>1</sup> H- <sup>1</sup> H COSY spectrum of deothideomarin C ( <b>3</b> ) .....                                                                                            | 15 |
| <b>Figure S23.</b> HSQC spectrum of deothideomarin C ( <b>3</b> ) .....                                                                                                                           | 16 |
| <b>Figure S24.</b> HMBC spectrum of deothideomarin C ( <b>3</b> ) .....                                                                                                                           | 16 |
| <b>Figure S25.</b> NOESY spectrum of deothideomarin C ( <b>3</b> ).....                                                                                                                           | 17 |
| <b>Figure S26.</b> Key HMBC, COSY, correlations of (±)-deothideomarin C ( <b>3</b> ).....                                                                                                         | 17 |
| <b>Figure S27.</b> HRESIMS spectrum of deothideomarin D ( <b>4</b> ).....                                                                                                                         | 17 |
| <b>Figure S28.</b> <sup>1</sup> H NMR (600 MHz, DMSO- <i>d</i> <sub>6</sub> ) spectrum of deothideomarin D ( <b>4</b> ) .....                                                                     | 18 |
| <b>Figure S29.</b> <sup>13</sup> C NMR (150 MHz, DMSO- <i>d</i> <sub>6</sub> ) spectrum of deothideomarin D ( <b>4</b> ) .....                                                                    | 18 |
| <b>Figure S30.</b> <sup>1</sup> H- <sup>1</sup> H COSY spectrum of deothideomarin D ( <b>4</b> ) .....                                                                                            | 19 |
| <b>Figure S31.</b> HSQC spectrum of deothideomarin D ( <b>4</b> ) .....                                                                                                                           | 20 |
| <b>Figure S32.</b> HMBC spectrum of deothideomarin D ( <b>4</b> ) .....                                                                                                                           | 20 |
| <b>Figure S33.</b> NOESY spectrum of deothideomarin D ( <b>4</b> ) .....                                                                                                                          | 21 |
| <b>Figure S34.</b> Key HMBC, COSY, correlations of (±)-deothideomarin D ( <b>4</b> ) .....                                                                                                        | 21 |
| <b>Table S1.</b> Crystal data and structure refinement for <b>1</b> .....                                                                                                                         | 22 |
| <b>Table S2.</b> Cartesian coordinates of the low-energy reoptimized conformer of (3R, 2'S)-1 ( <b>1a</b> ) calculated at B3LYP/6 31 + G(d) level of theory with PCM solvent model for MeOH. .... | 23 |

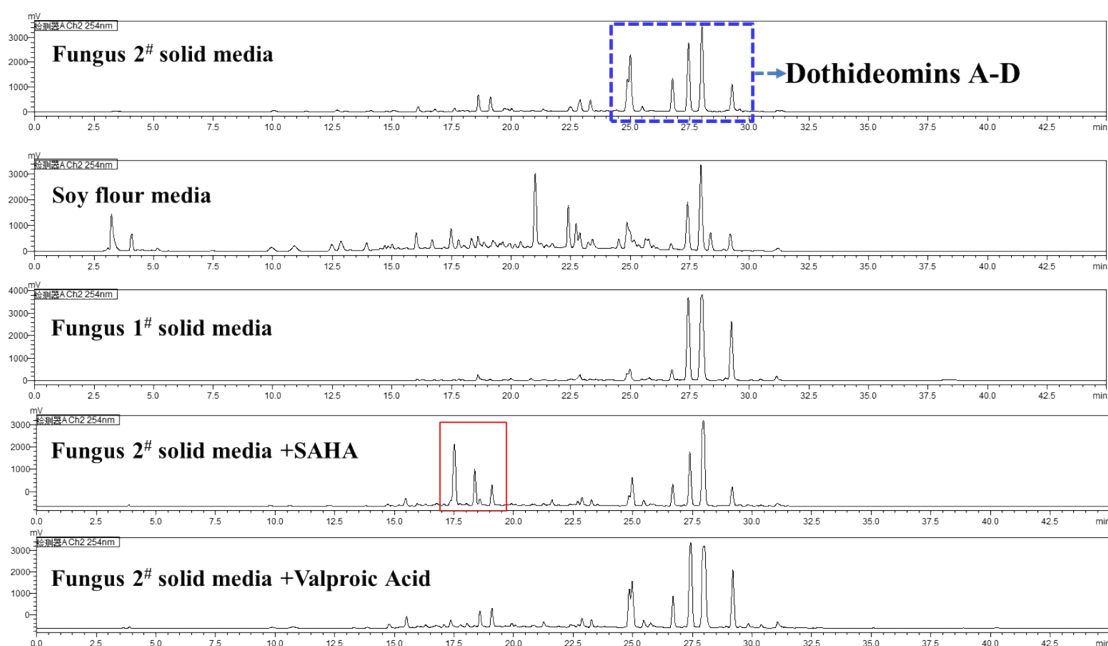

**Figure S1.** HPLC analysis of the crude extracts of the fungus *Dothideomyces* sp. BMC-101 using the OSMAC strategy.

### Chiral separations of **1a/1b** and **2a/2b**

Chromatographic conditions:

Compounds **1a/1b**:

- (1) Column: Daicel Chiralpak OD-H column (4.6 × 250 mm, 5 μm)
- (2) Mobile phase: n-hexane -2-propanol (90:10, v/v)
- (3) Wavelength: 201/254 nm
- (4) Flow rate: 1.0 mL/min

Compounds **2a/2b**:

- (1) Column: Daicel Chiralpak AD-H column (4.6 × 250 mm, 5 μm)
- (2) Mobile phase: n-hexane -2-propanol (96:4, v/v)
- (3) Wavelength: 201/254 nm
- (4) Flow rate: 1.0 mL/min

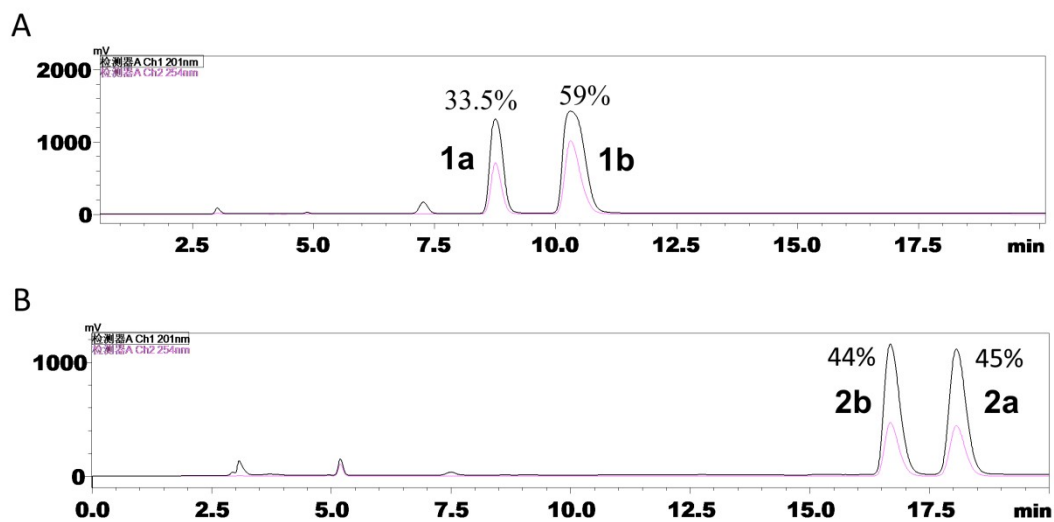

**Figure S2.** Chiral separations of compounds 1 and 2.

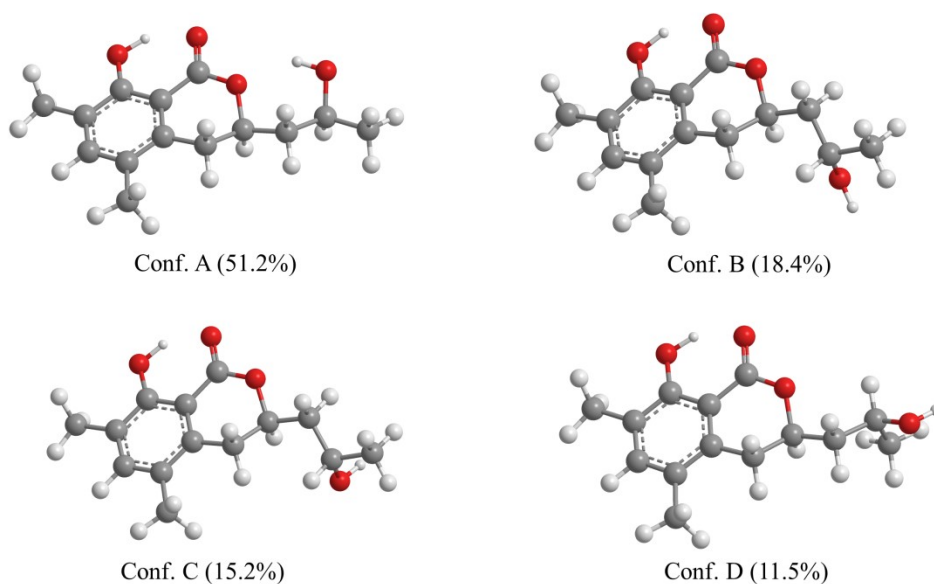

**Figure S3.** Conformations of lowest-energy conformers (>5% population) of (3R, 2'S)-1 (1a).

H6-4-2-1 #15 RT: 0.20 AV: 1 NL: 1.62E7  
T: FTMS + p ESI Full ms [180.00-1000.00]

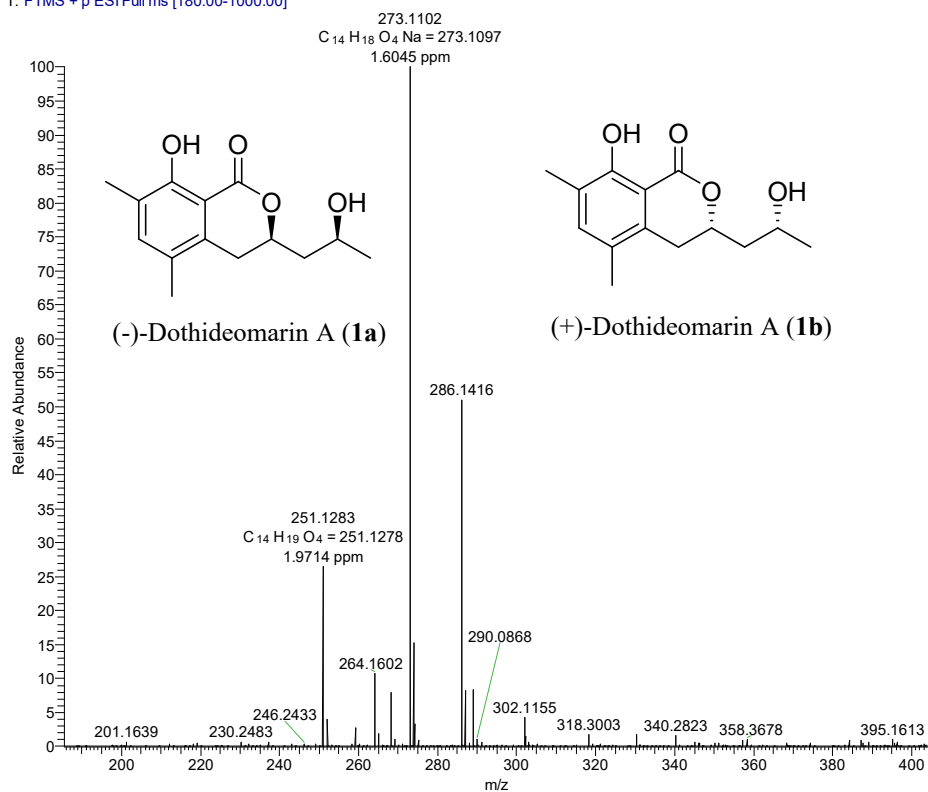

Figure S4. HRESIMS spectrum of (±)-deothideomarin A (1)

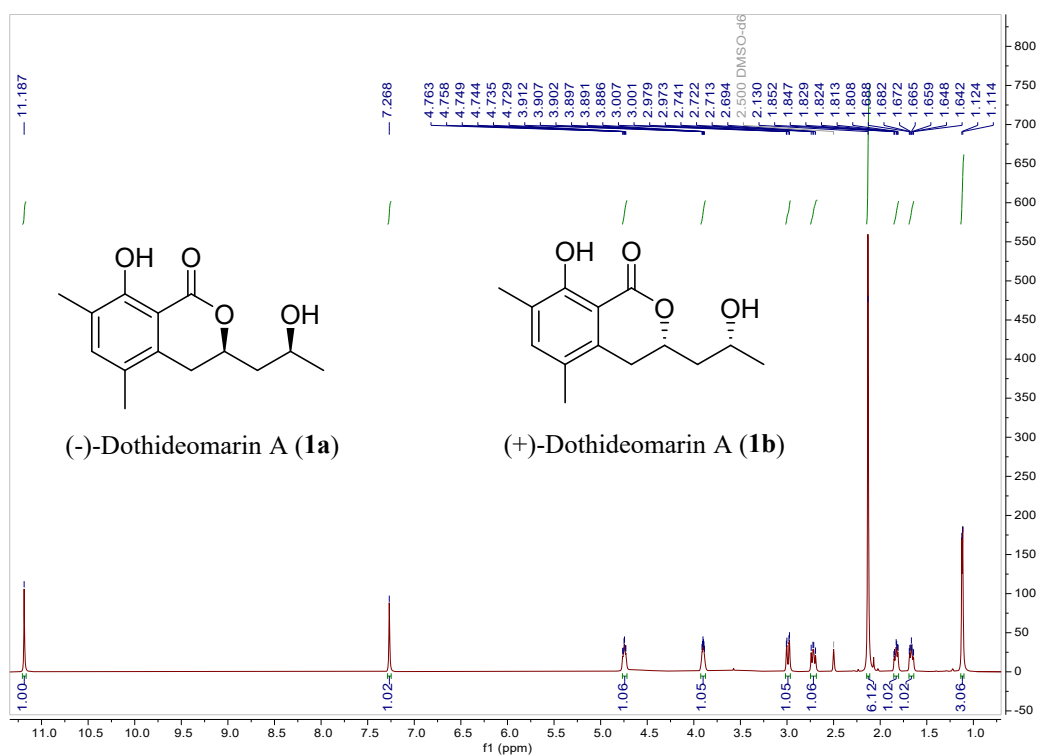

Figure S5.  $^1H$  NMR (600 MHz,  $DMSO-d_6$ ) spectrum of (±)-deothideomarin A (1)

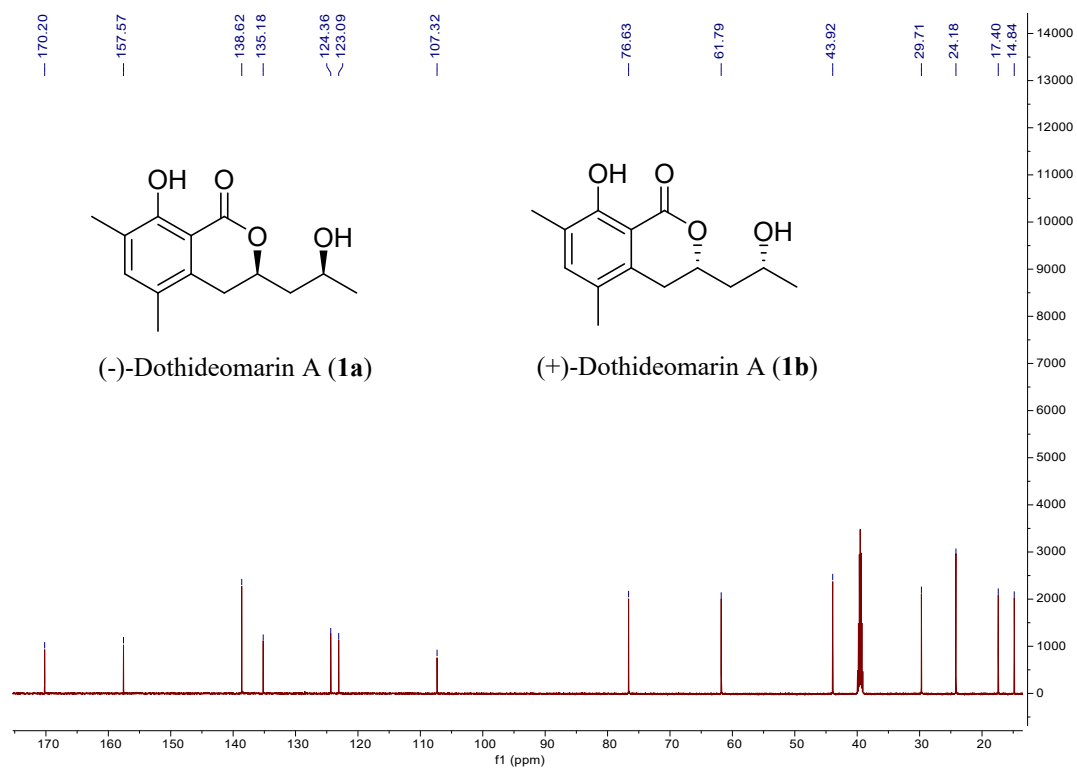

**Figure S6.**  $^{13}\text{C}$  NMR (150 MHz,  $\text{DMSO-}d_6$ ) spectrum of ( $\pm$ )-deothideomarin A (**1**)

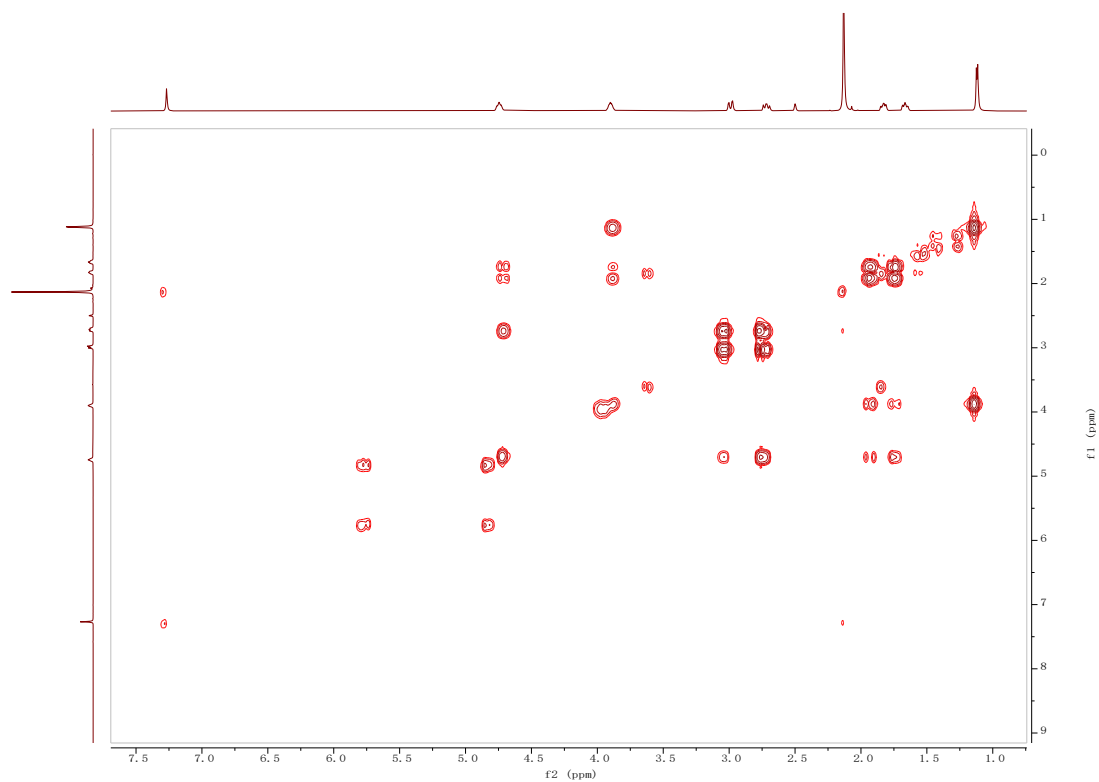

**Figure S7.**  $^1\text{H}$ - $^1\text{H}$  COSY spectrum of ( $\pm$ )-deothideomarin A (**1**)

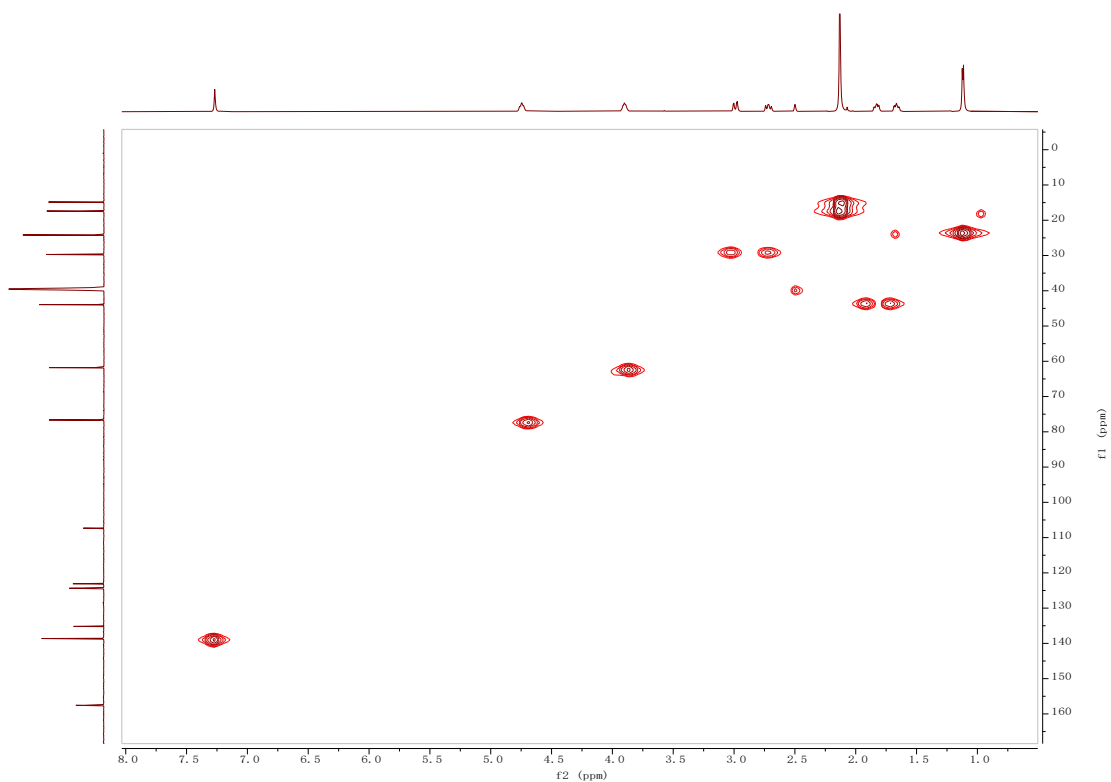

**Figure S8.** HSQC spectrum of (±)-deothideomarin A (**1**)

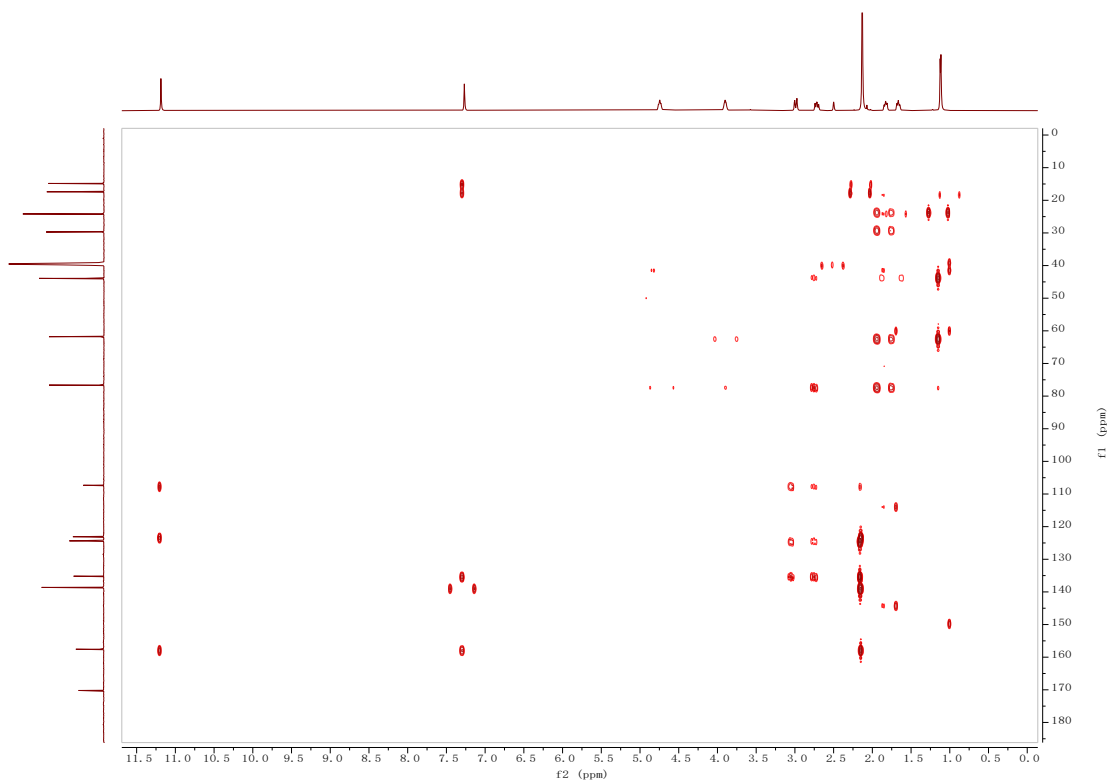

**Figure S9.** HMBC spectrum of (±)-deothideomarin A (**1**)

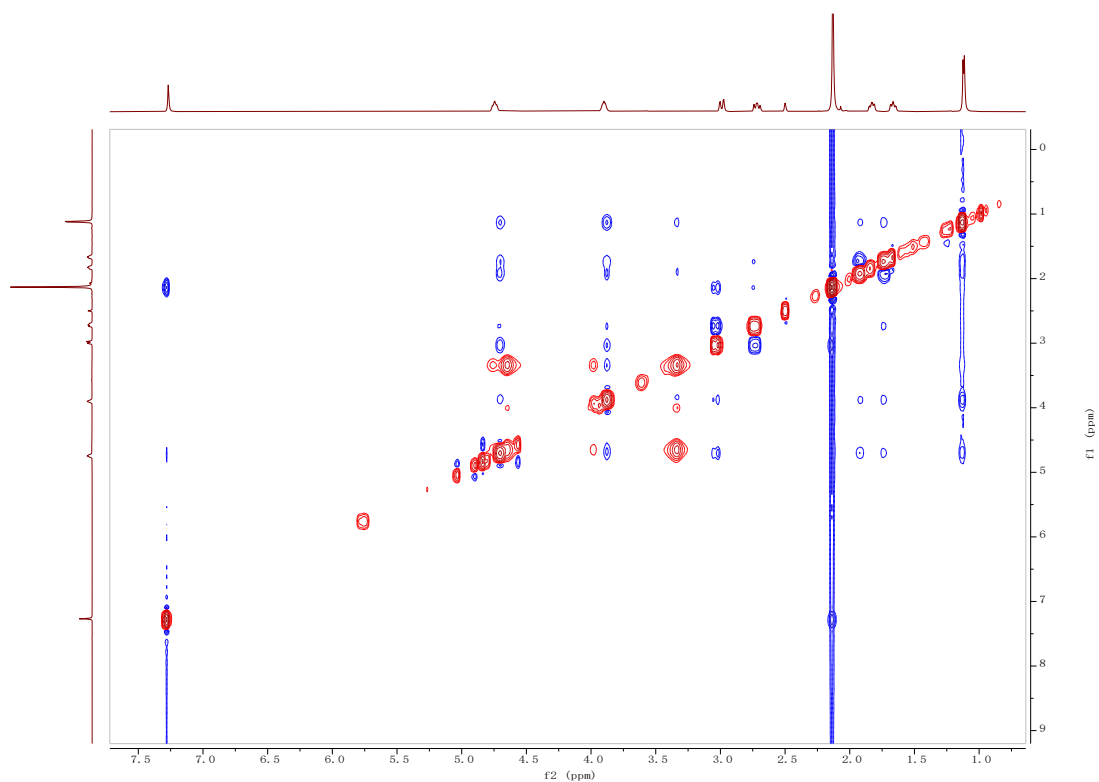

**Figure S10.** NOESY spectrum of (±)-deothideomarin A (**1**)

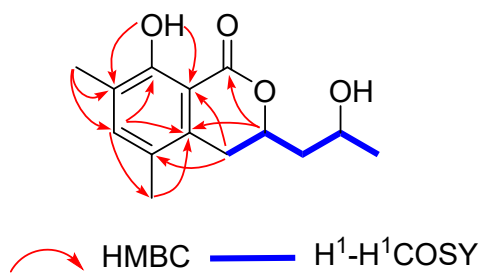

**Figure S11.** Key HMBC, COSY, correlations of (±)-deothideomarin A (**1**)

H6-4-1-1 #11 RT: 0.16 AV: 1 NL: 1.76E6  
T: FTMS + p ESI Full ms [180.00-1000.00]

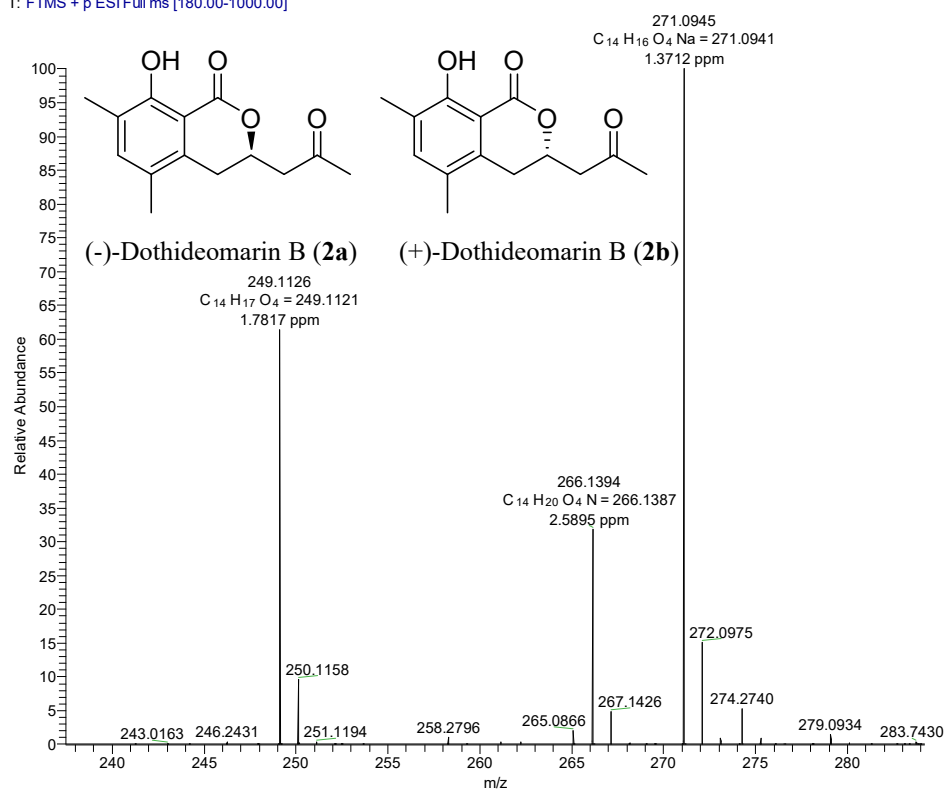

Figure S12. HRMSIMS spectrum of (±)-deothideomarin B (2)

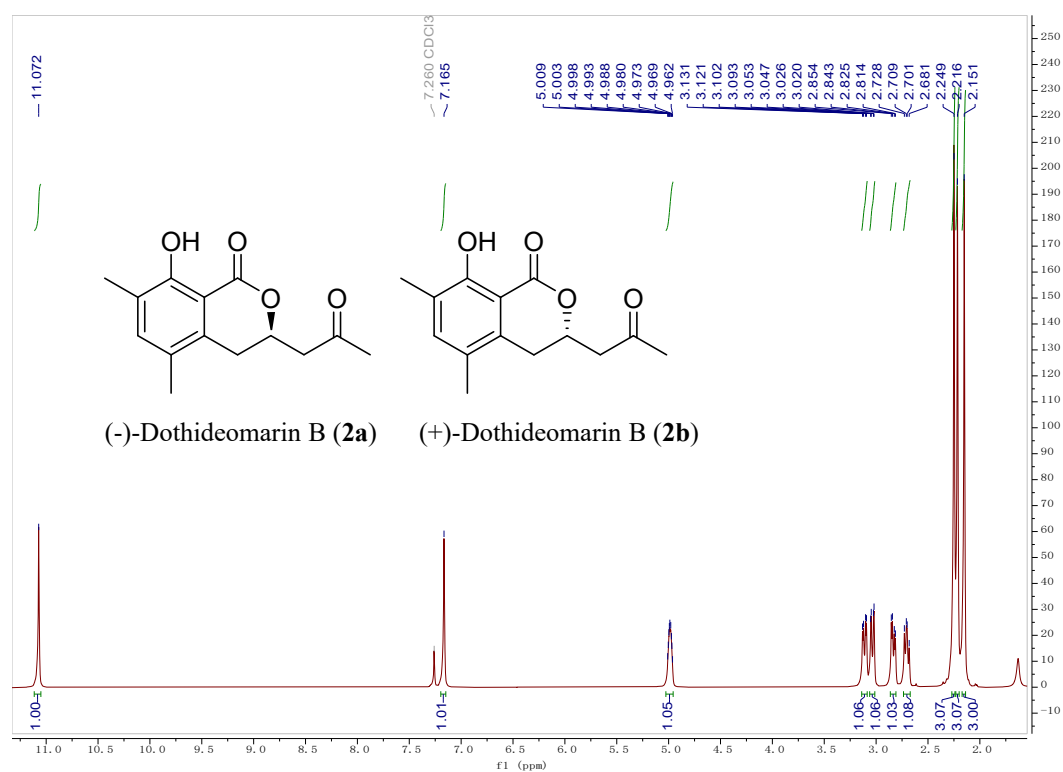

Figure S13. <sup>1</sup>H NMR (600 MHz, CDCl<sub>3</sub>) spectrum of (±)-deothideomarin B (2)

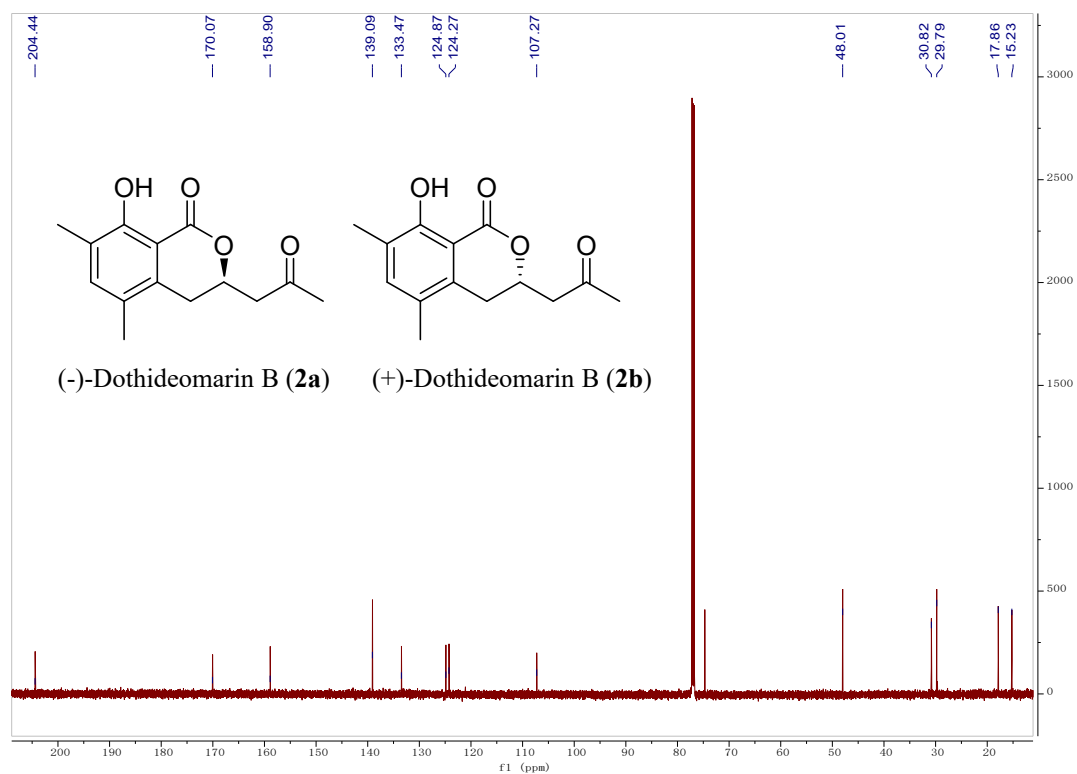

**Figure S14.**  $^{13}\text{C}$  NMR (150 MHz,  $\text{CDCl}_3$ ) spectrum of ( $\pm$ )-deothideomarin B (2)

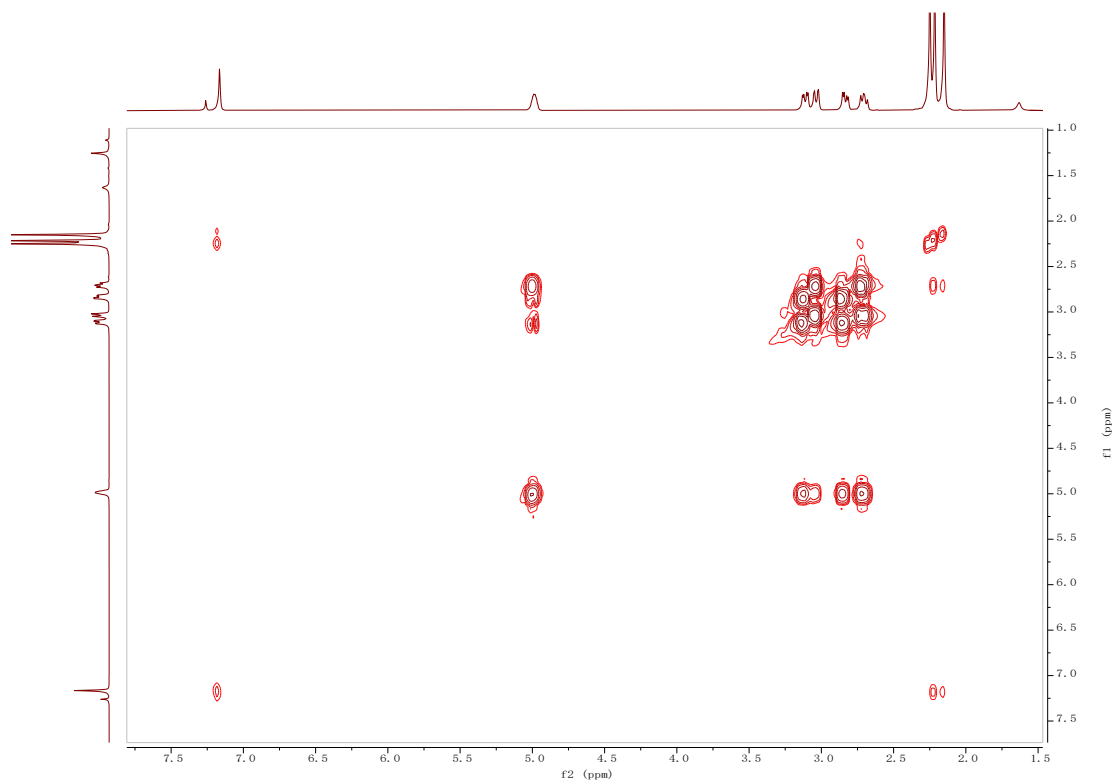

**Figure S15.**  $^1\text{H}$ - $^1\text{H}$  COSY spectrum of ( $\pm$ )-deothideomarin B (2)

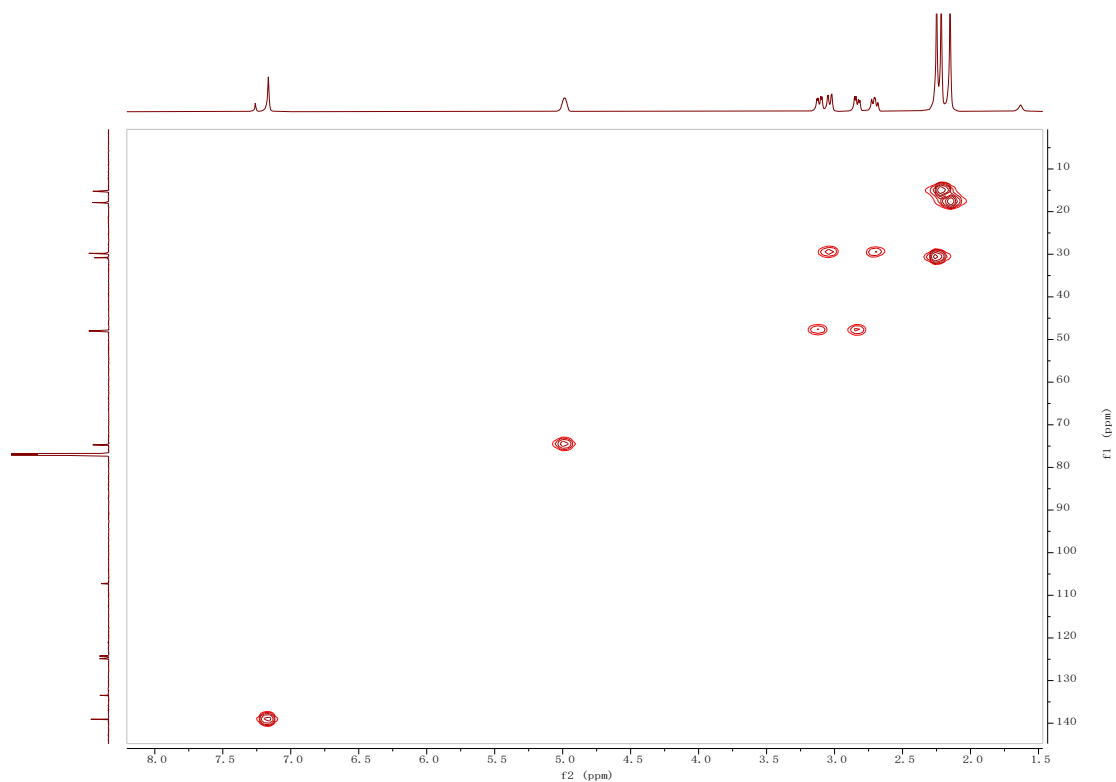

**Figure S16.** HSQC spectrum of (±)-deothideomarin B (2)

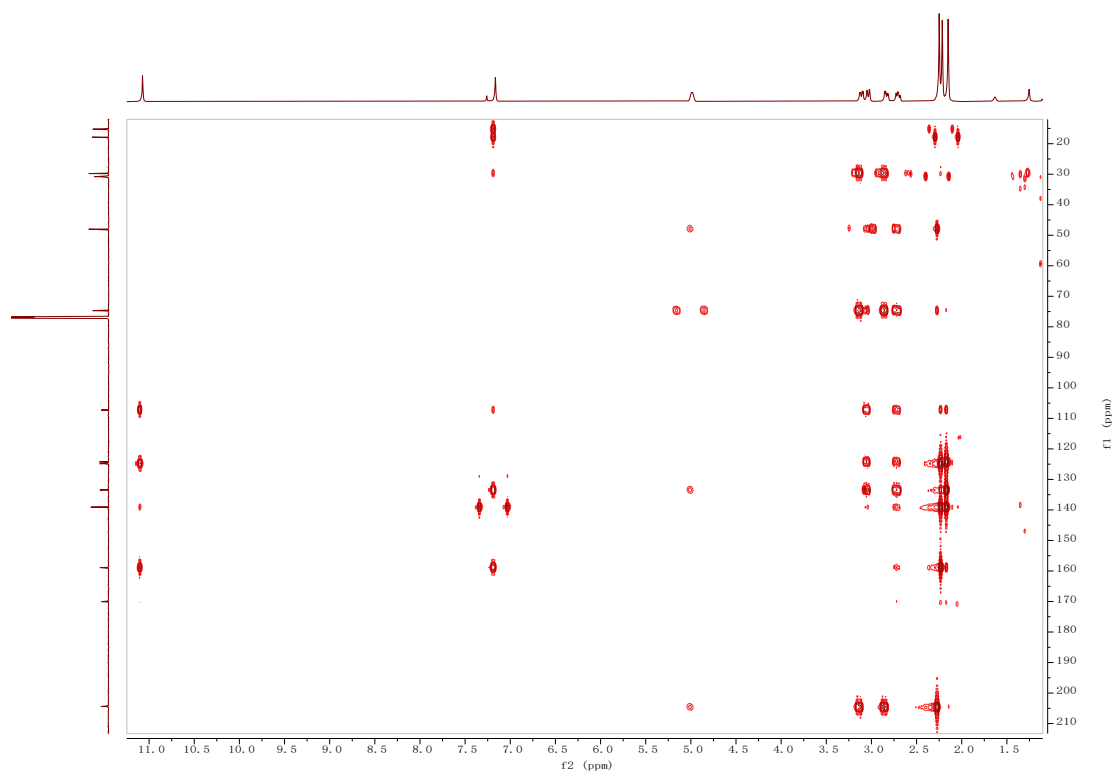

**Figure S17.** HMBC spectrum of (±)-deothideomarin B (2)

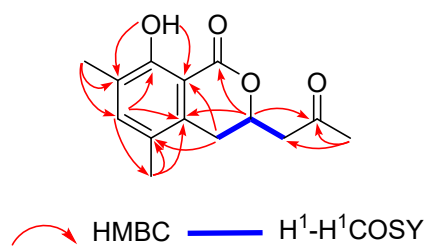

**Figure S18.** Key HMBC, COSY, correlations of (±)-dothideomarin B (2)

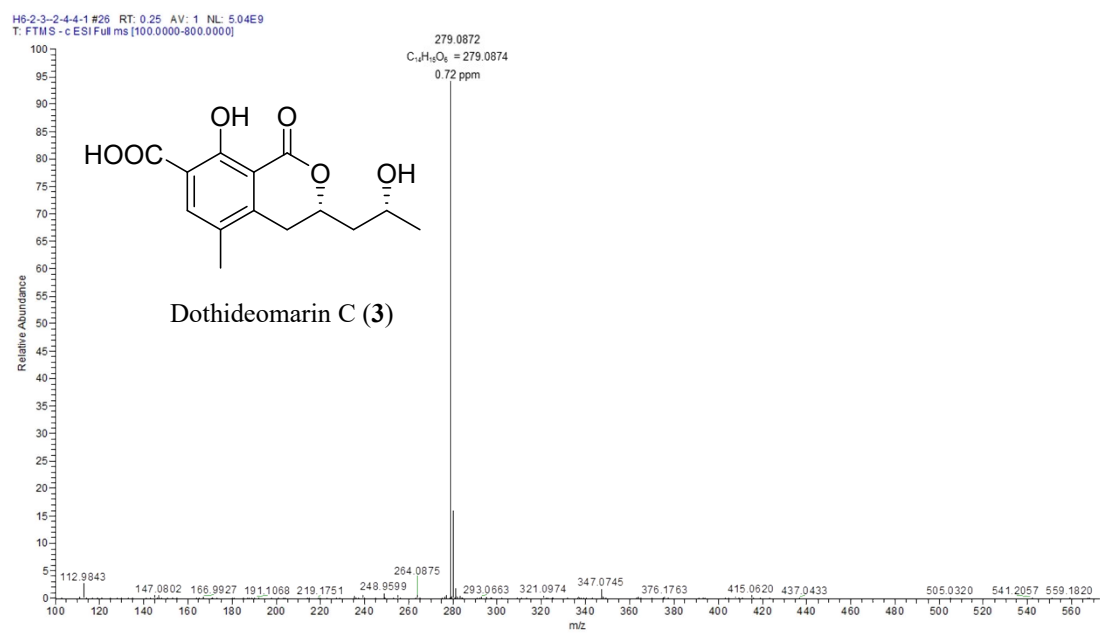

**Figure S19.** HRESIMS spectrum of dothideomarin C (3)

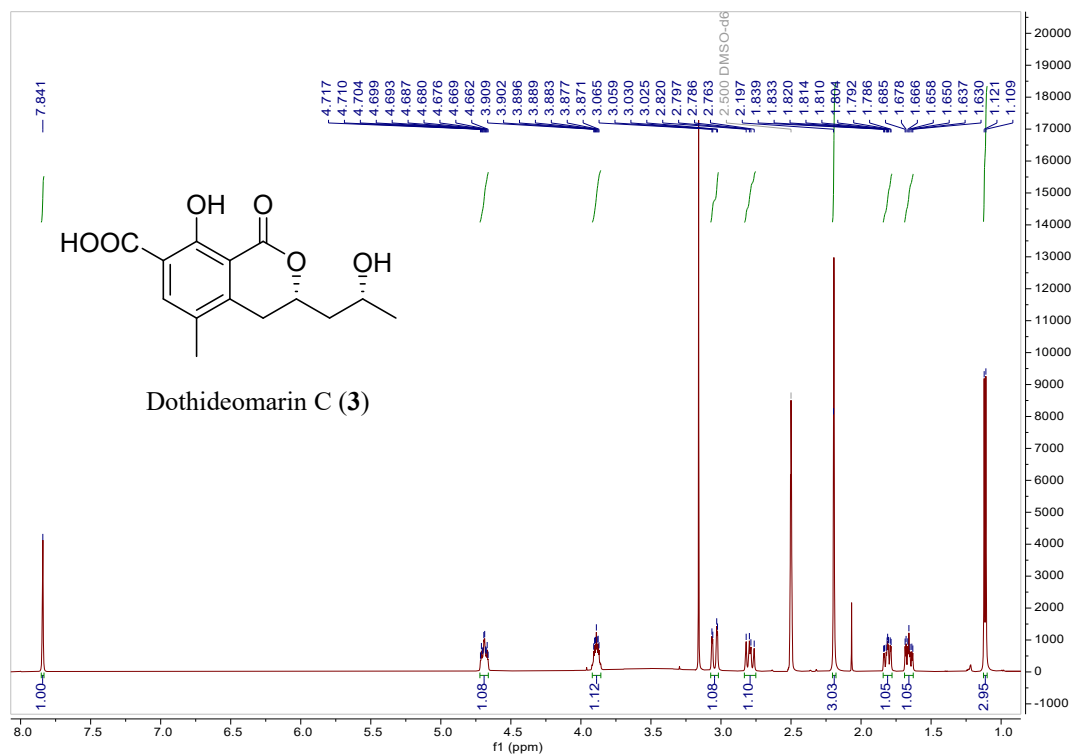

Figure S20.  $^1\text{H}$  NMR (500 MHz,  $\text{DMSO-}d_6$ ) spectrum of dothideomarin C (3)

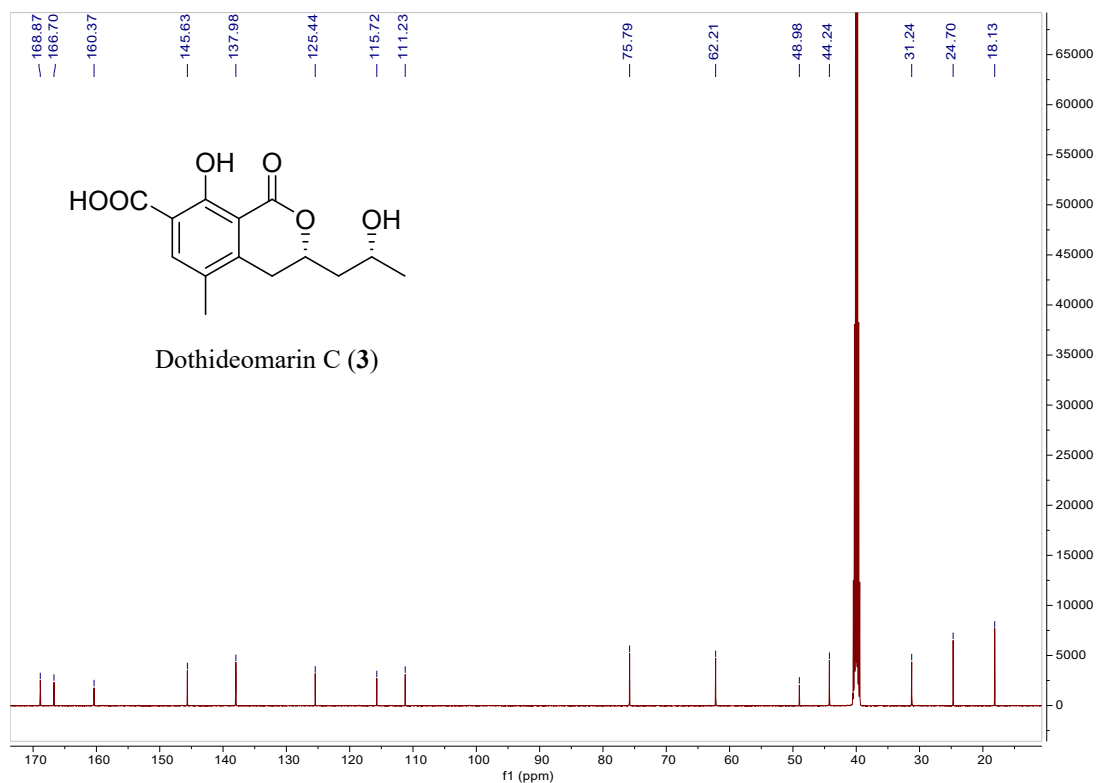

Figure S21.  $^{13}\text{C}$  NMR (125 MHz,  $\text{DMSO-}d_6$ ) spectrum of dothideomarin C (3)

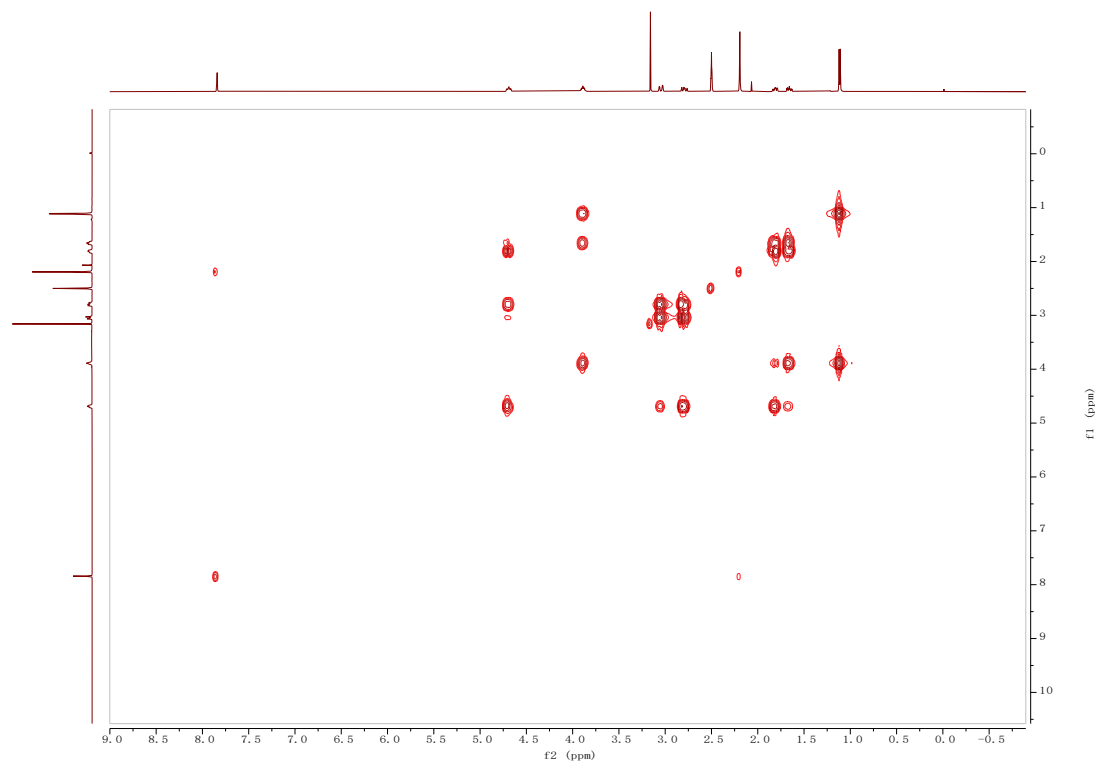

**Figure S22.**  $^1\text{H}$ - $^1\text{H}$  COSY spectrum of deothideomarin C (3)

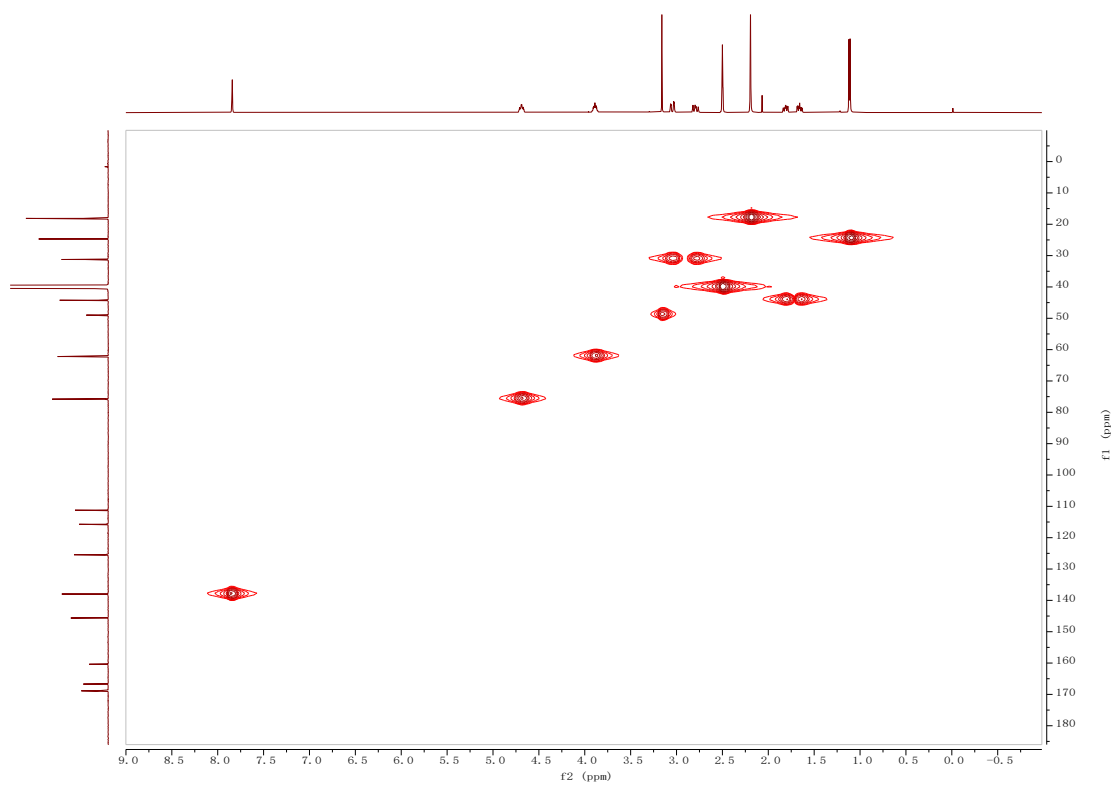

**Figure S23.** HSQC spectrum of deothideomarin C (3)

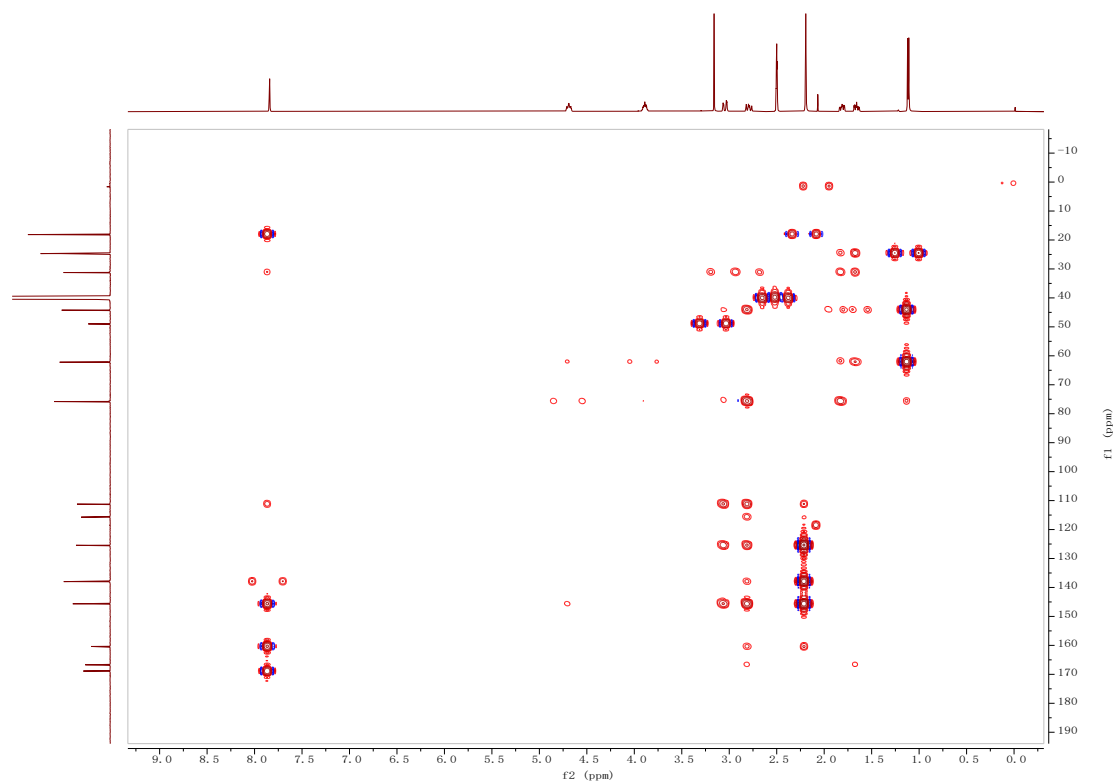

Figure S24. HMBC spectrum of deothideomarin C (3)

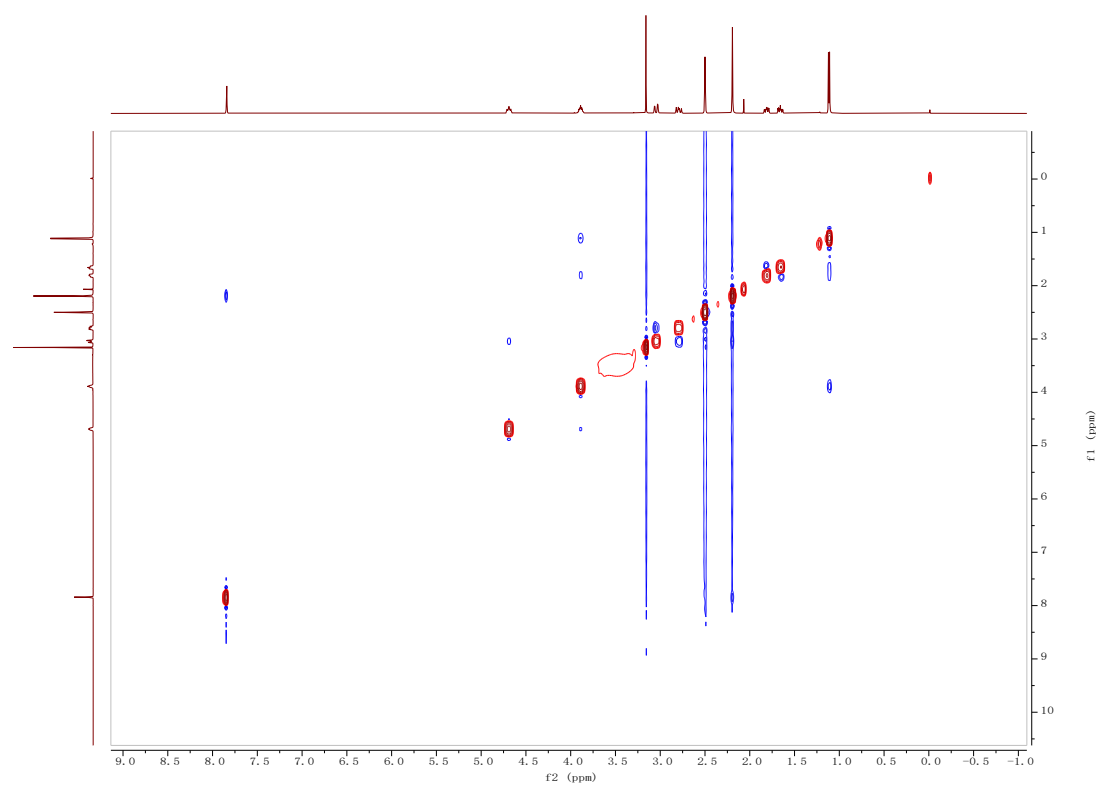

Figure S25. NOESY spectrum of deothideomarin C (3)

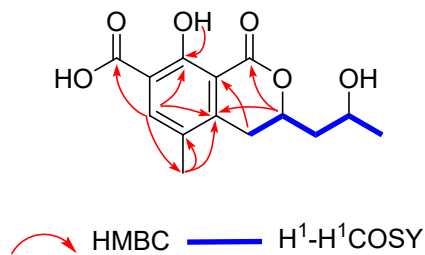

**Figure S26.** Key HMBC, COSY, correlations of (±)-dothideomarin C (**3**)

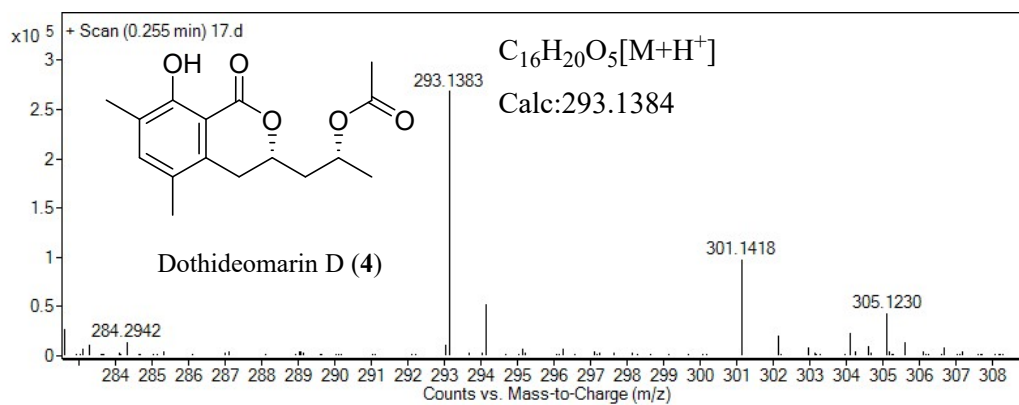

**Figure S27.** HRESIMS spectrum of dothideomarin D (**4**)

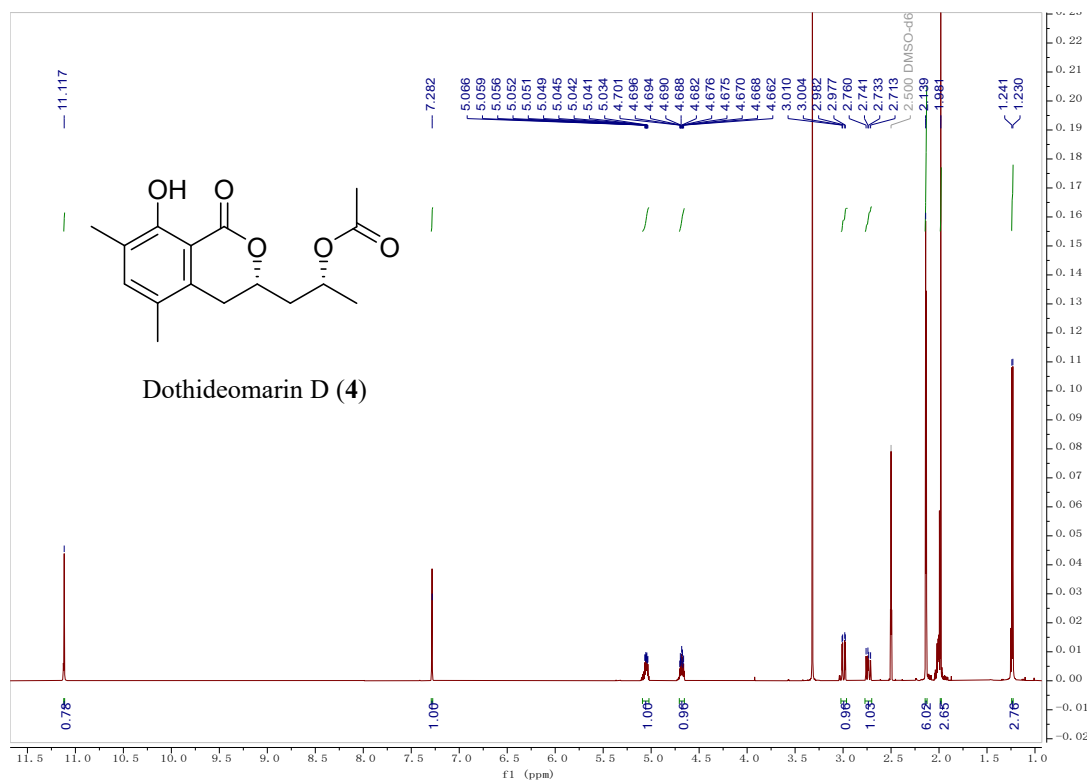

**Figure S28.** <sup>1</sup>H NMR (600 MHz, DMSO-*d*<sub>6</sub>) spectrum of dothideomarin D (**4**)

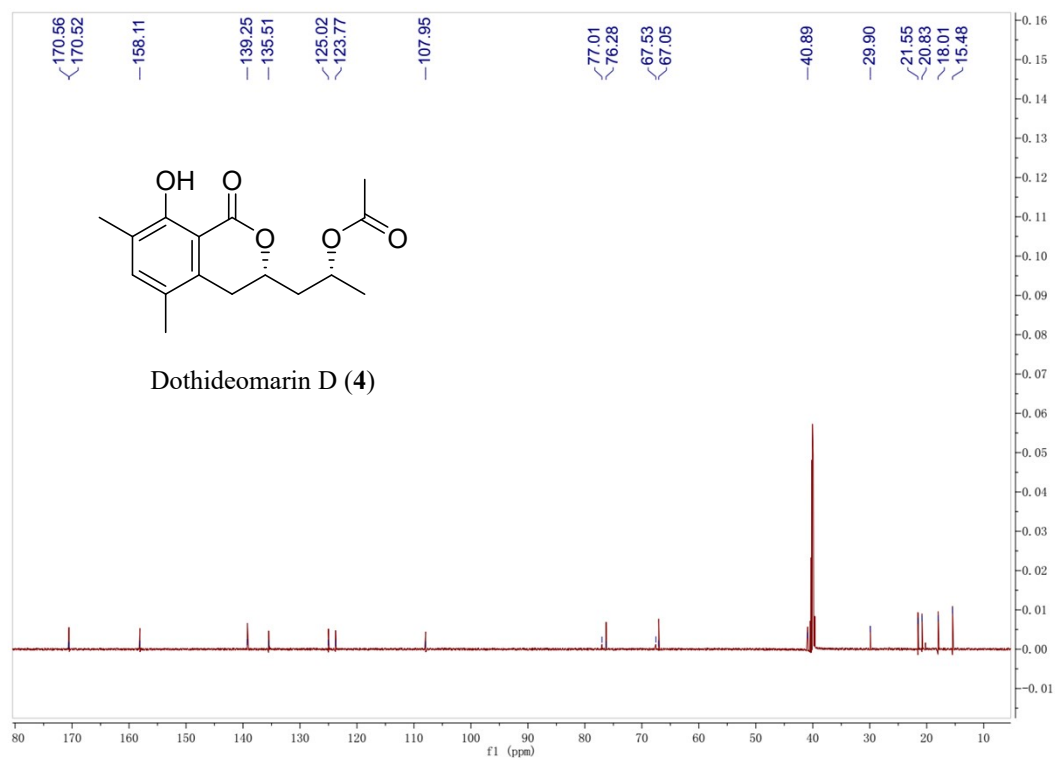

**Figure S29.** <sup>13</sup>C NMR (150 MHz, DMSO-*d*<sub>6</sub>) spectrum of dothideomarin D (4)

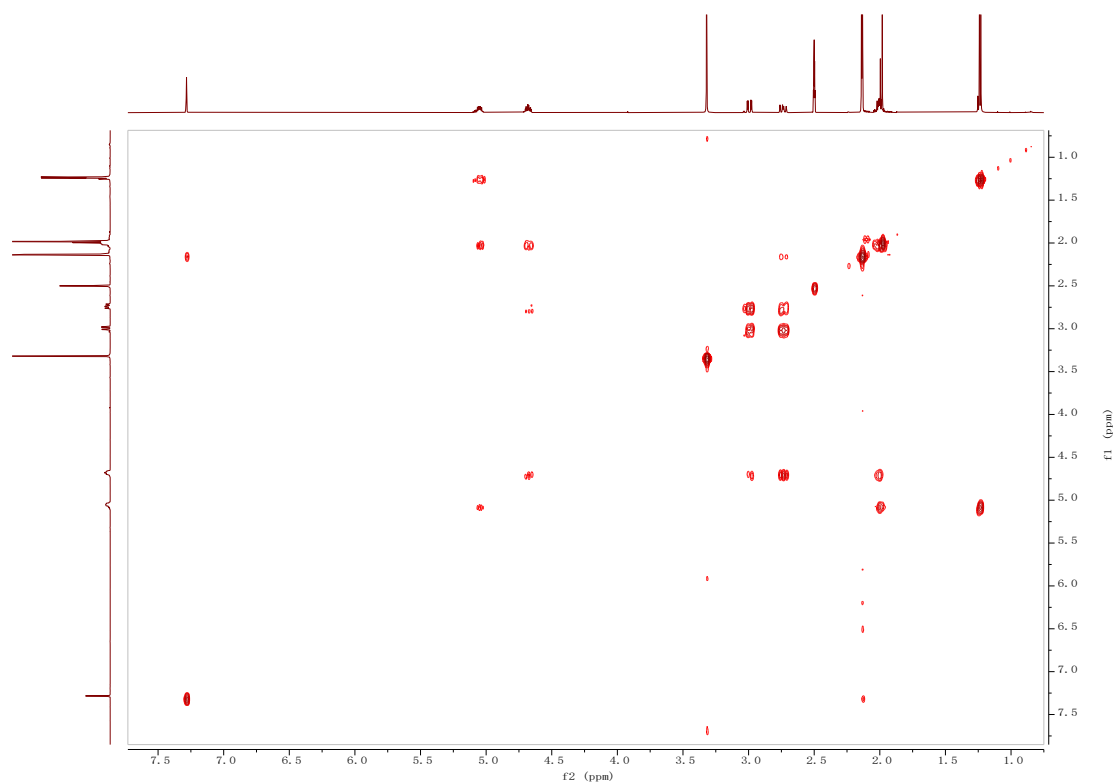

**Figure S30.** <sup>1</sup>H-<sup>1</sup>H COSY spectrum of dothideomarin D (4)

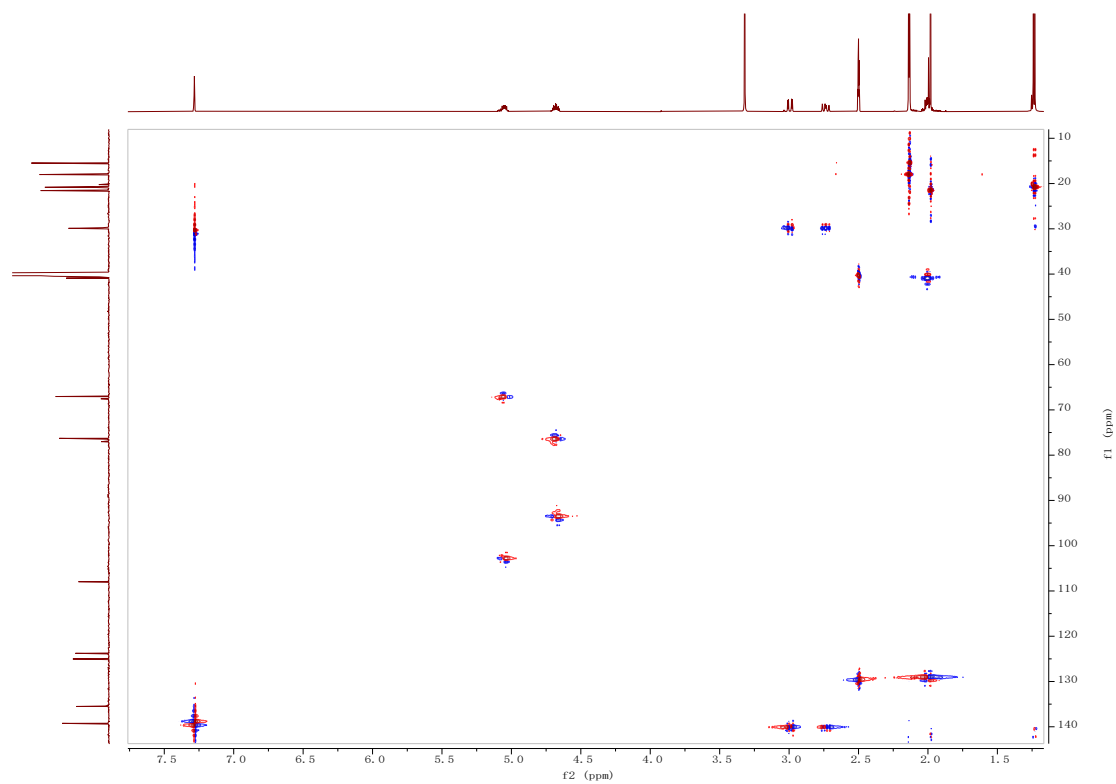

**Figure S31.** HSQC spectrum of deothideomarin D (**4**)

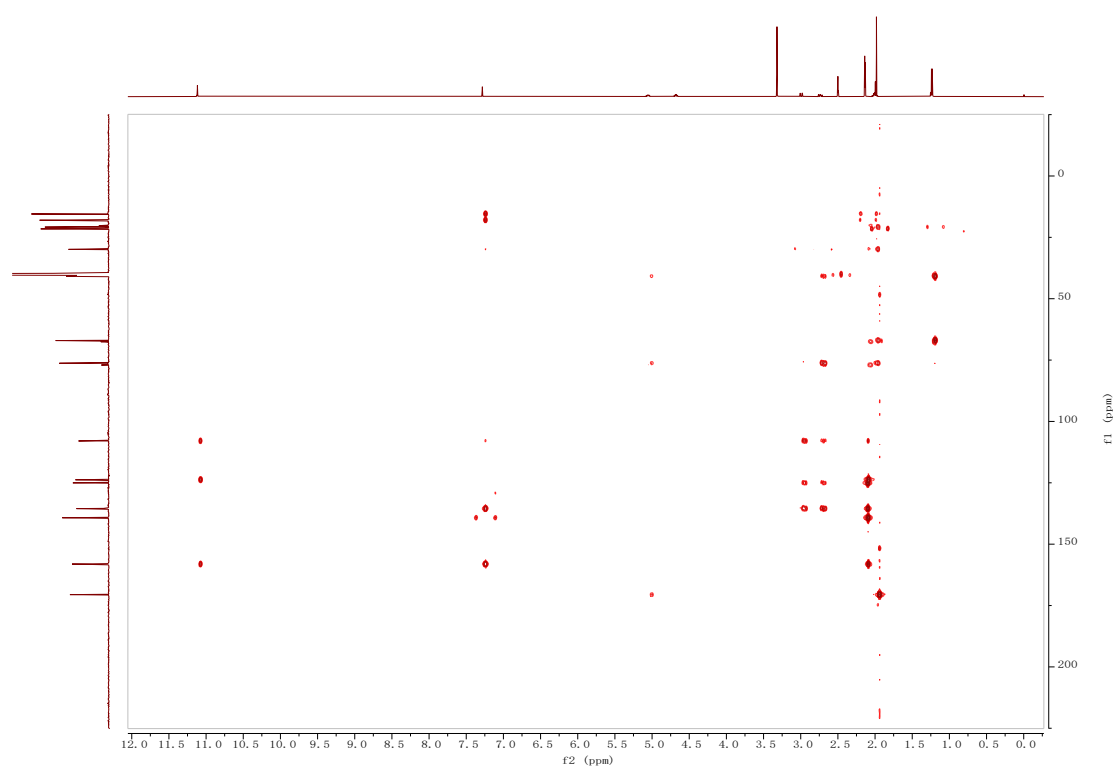

**Figure S32.** HMBC spectrum of deothideomarin D (**4**)

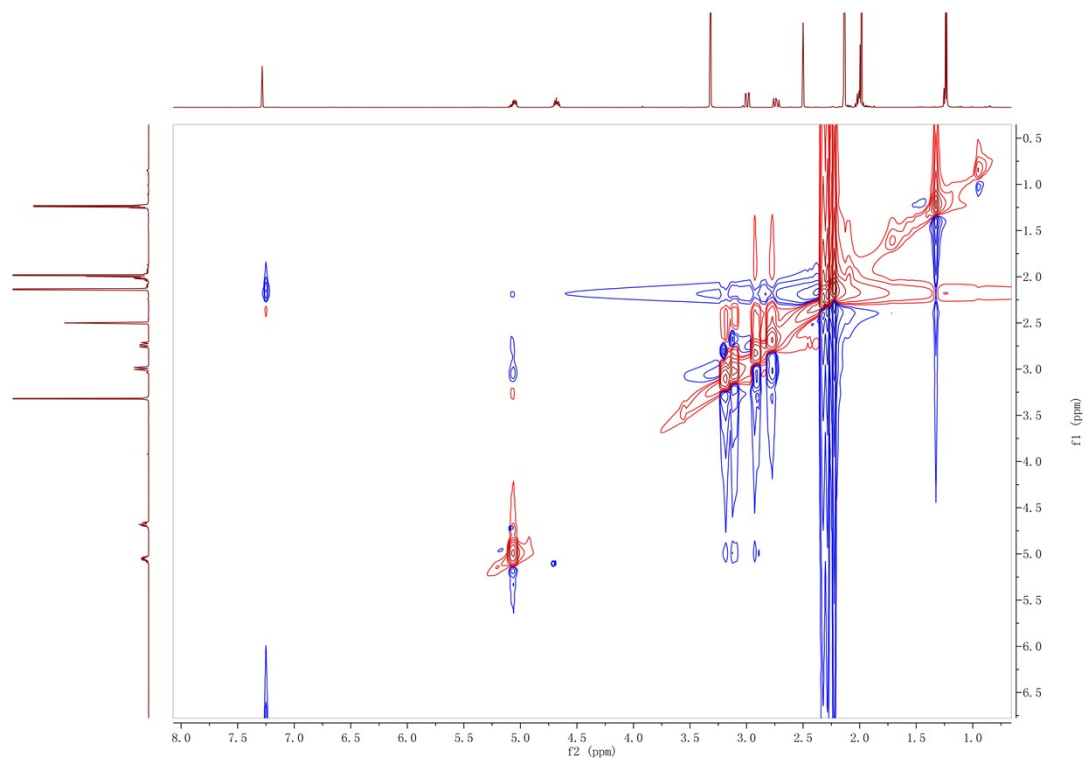

**Figure S33.** NOESY spectrum of deothideomarin D (4)

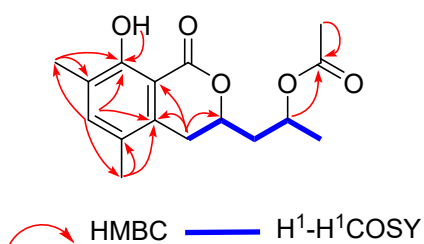

**Figure S34.** Key HMBC, COSY, correlations of (±)-deothideomarin D (4)

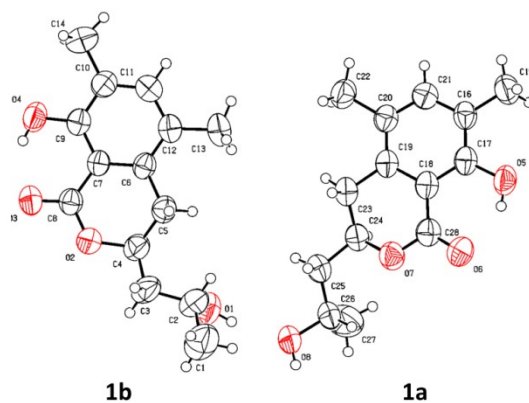

CDCC: 2443606

**Table S1.** Crystal data and structure refinement for **1**

|                                             |                                                               |
|---------------------------------------------|---------------------------------------------------------------|
| Empirical formula                           | C <sub>14</sub> H <sub>18</sub> O <sub>4</sub>                |
| Formula weight                              | 250.28                                                        |
| Temperature/K                               | 303.00                                                        |
| Crystal system                              | monoclinic                                                    |
| Space group                                 | P2 <sub>1</sub> /c                                            |
| a/Å                                         | 8.5056(3)                                                     |
| b/Å                                         | 39.6740(13)                                                   |
| c/Å                                         | 7.9424(3)                                                     |
| α/°                                         | 90                                                            |
| β/°                                         | 94.882(2)                                                     |
| γ/°                                         | 90                                                            |
| Volume/Å <sup>3</sup>                       | 2670.45(16)                                                   |
| Z                                           | 8                                                             |
| ρ <sub>calc</sub> /cm <sup>3</sup>          | 1.245                                                         |
| μ/mm <sup>-1</sup>                          | 0.745                                                         |
| F(000)                                      | 1072.0                                                        |
| Crystal size/mm <sup>3</sup>                | 0.2 × 0.18 × 0.1                                              |
| Radiation                                   | CuKα (λ = 1.54178)                                            |
| 2θ range for data collection/°              | 4.454 to 136.784                                              |
| Index ranges                                | -8 ≤ h ≤ 9, -45 ≤ k ≤ 47, -9 ≤ l ≤ 9                          |
| Reflections collected                       | 19445                                                         |
| Independent reflections                     | 4745 [R <sub>int</sub> = 0.0389, R <sub>sigma</sub> = 0.0381] |
| Data/restraints/parameters                  | 4745/0/335                                                    |
| Goodness-of-fit on F <sup>2</sup>           | 1.077                                                         |
| Final R indexes [I >= 2σ (I)]               | R <sub>1</sub> = 0.0674, wR <sub>2</sub> = 0.1850             |
| Final R indexes [all data]                  | R <sub>1</sub> = 0.0893, wR <sub>2</sub> = 0.2007             |
| Largest diff. peak/hole / e Å <sup>-3</sup> | 0.23/-0.21                                                    |

**Table S2.** Cartesian coordinates of the low-energy reoptimized conformer of (3*R*, 2'*S*)-1 (**1a**) calculated at B3LYP/6 31 + G(d) level of theory with PCM solvent model for MeOH.

| Conformer A |      | Standard Orientation<br>(Ångstroms) |          |          |
|-------------|------|-------------------------------------|----------|----------|
| number      | Atom | X                                   | Y        | Z        |
| 1           | C    | -3.46624                            | -0.14901 | 0.19744  |
| 2           | C    | -3.24131                            | 1.2251   | 0.12954  |
| 3           | C    | -1.97216                            | 1.80342  | -0.0622  |
| 4           | C    | -0.87118                            | 0.94928  | -0.16976 |
| 5           | C    | -1.05625                            | -0.45391 | -0.10137 |
| 6           | C    | -2.35446                            | -1.00002 | 0.06247  |
| 7           | C    | 0.53151                             | 1.46087  | -0.4004  |
| 8           | C    | 1.56249                             | 0.52426  | 0.21031  |
| 9           | O    | 1.33092                             | -0.84869 | -0.26681 |
| 10          | C    | 0.08638                             | -1.36157 | -0.24861 |
| 11          | O    | -2.57934                            | -2.33558 | 0.09688  |
| 12          | C    | -4.84544                            | -0.72763 | 0.38985  |
| 13          | C    | -1.83099                            | 3.30743  | -0.15195 |
| 14          | O    | -0.02202                            | -2.58678 | -0.38009 |
| 15          | C    | 3.00679                             | 0.88088  | -0.12447 |
| 16          | C    | 4.06876                             | -0.04926 | 0.48703  |
| 17          | C    | 5.47032                             | 0.53985  | 0.38003  |
| 18          | O    | 4.10432                             | -1.32764 | -0.17496 |
| 19          | H    | -4.09994                            | 1.88732  | 0.22355  |
| 20          | H    | 0.72328                             | 1.56877  | -1.4786  |
| 21          | H    | 0.66315                             | 2.45225  | 0.04348  |
| 22          | H    | 1.43033                             | 0.48542  | 1.29921  |
| 23          | H    | -1.7152                             | -2.78435 | -0.08084 |
| 24          | H    | -5.12778                            | -1.37545 | -0.44922 |
| 25          | H    | -5.59076                            | 0.06902  | 0.47334  |
| 26          | H    | -4.89854                            | -1.3434  | 1.29617  |
| 27          | H    | -2.81068                            | 3.79093  | -0.08913 |
| 28          | H    | -1.21157                            | 3.71062  | 0.65982  |
| 29          | H    | -1.36682                            | 3.61853  | -1.09608 |
| 30          | H    | 3.14028                             | 0.91437  | -1.21391 |
| 31          | H    | 3.1728                              | 1.89724  | 0.25517  |
| 32          | H    | 3.82894                             | -0.20823 | 1.55089  |
| 33          | H    | 5.72249                             | 0.75219  | -0.66606 |
| 34          | H    | 6.20831                             | -0.16601 | 0.77646  |
| 35          | H    | 5.54302                             | 1.47128  | 0.95218  |
| 36          | H    | 3.18837                             | -1.64914 | -0.24408 |

| Conformer B |      | Standard Orientation<br>(Ångstroms) |          |          |
|-------------|------|-------------------------------------|----------|----------|
| number      | Atom | X                                   | Y        | Z        |
| 1           | C    | -3.37665                            | 0.53212  | 0.20594  |
| 2           | C    | -2.71918                            | 1.74909  | 0.03023  |
| 3           | C    | -1.33997                            | 1.86408  | -0.22632 |
| 4           | C    | -0.58341                            | 0.68989  | -0.28677 |
| 5           | C    | -1.2124                             | -0.56592 | -0.10893 |
| 6           | C    | -2.60952                            | -0.64354 | 0.1168   |
| 7           | C    | 0.89881                             | 0.69416  | -0.57919 |
| 8           | C    | 1.58949                             | -0.48879 | 0.08252  |
| 9           | O    | 0.9058                              | -1.73743 | -0.28127 |
| 10          | C    | -0.43071                            | -1.8058  | -0.20939 |
| 11          | O    | -3.2553                             | -1.82713 | 0.25402  |
| 12          | C    | -4.86011                            | 0.45195  | 0.46497  |
| 13          | C    | -0.71882                            | 3.22844  | -0.43314 |
| 14          | O    | -0.94673                            | -2.93188 | -0.25398 |
| 15          | C    | 3.04668                             | -0.70298 | -0.31809 |
| 16          | C    | 3.99297                             | 0.41821  | 0.11621  |
| 17          | C    | 5.43363                             | 0.13902  | -0.31104 |
| 18          | O    | 3.88255                             | 0.52417  | 1.54999  |
| 19          | H    | -3.31055                            | 2.66113  | 0.08805  |
| 20          | H    | 1.07129                             | 0.665    | -1.66612 |
| 21          | H    | 1.35871                             | 1.61605  | -0.2124  |
| 22          | H    | 1.50857                             | -0.40481 | 1.17127  |
| 23          | H    | -2.58894                            | -2.5424  | 0.09249  |
| 24          | H    | -5.37202                            | -0.12343 | -0.3163  |
| 25          | H    | -5.30148                            | 1.45259  | 0.49814  |
| 26          | H    | -5.07407                            | -0.04893 | 1.41728  |
| 27          | H    | -1.48364                            | 4.01016  | -0.39389 |
| 28          | H    | 0.0291                              | 3.45997  | 0.33651  |
| 29          | H    | -0.21498                            | 3.30517  | -1.40474 |
| 30          | H    | 3.39028                             | -1.64544 | 0.12672  |
| 31          | H    | 3.10658                             | -0.81354 | -1.40787 |
| 32          | H    | 3.6695                              | 1.36904  | -0.33208 |
| 33          | H    | 5.78801                             | -0.80619 | 0.1168   |
| 34          | H    | 6.09951                             | 0.94327  | 0.02461  |
| 35          | H    | 5.50735                             | 0.07796  | -1.40334 |
| 36          | H    | 4.46142                             | 1.24299  | 1.85181  |

| Conformer C |      | Standard Orientation<br>(Ångstroms) |          |          |
|-------------|------|-------------------------------------|----------|----------|
| number      | Atom | X                                   | Y        | Z        |
| 1           | C    | -3.37947                            | 0.5208   | 0.21653  |
| 2           | C    | -2.72901                            | 1.74199  | 0.04413  |
| 3           | C    | -1.35182                            | 1.8654   | -0.21942 |
| 4           | C    | -0.58984                            | 0.69538  | -0.29067 |
| 5           | C    | -1.21155                            | -0.56455 | -0.11629 |
| 6           | C    | -2.60699                            | -0.65048 | 0.11656  |
| 7           | C    | 0.89073                             | 0.7082   | -0.59113 |
| 8           | C    | 1.59075                             | -0.47364 | 0.06318  |
| 9           | O    | 0.91212                             | -1.72432 | -0.30215 |
| 10          | C    | -0.424                              | -1.79978 | -0.22621 |
| 11          | O    | -3.2461                             | -1.83802 | 0.25076  |
| 12          | C    | -4.86106                            | 0.43167  | 0.48319  |
| 13          | C    | -0.73865                            | 3.23407  | -0.42144 |
| 14          | O    | -0.93418                            | -2.92833 | -0.27443 |
| 15          | C    | 3.04785                             | -0.67461 | -0.34228 |
| 16          | C    | 3.99669                             | 0.43369  | 0.14045  |
| 17          | C    | 5.43518                             | 0.18156  | -0.31024 |
| 18          | O    | 3.91966                             | 0.6028   | 1.56917  |
| 19          | H    | -3.32454                            | 2.65072  | 0.11055  |
| 20          | H    | 1.05778                             | 0.68276  | -1.67895 |
| 21          | H    | 1.34749                             | 1.63162  | -0.22424 |
| 22          | H    | 1.51339                             | -0.39331 | 1.15292  |
| 23          | H    | -2.57722                            | -2.54912 | 0.08175  |
| 24          | H    | -5.37468                            | -0.1397  | -0.29991 |
| 25          | H    | -5.30683                            | 1.42995  | 0.52694  |
| 26          | H    | -5.06731                            | -0.07799 | 1.43252  |
| 27          | H    | -1.50709                            | 4.0117   | -0.3729  |
| 28          | H    | 0.01255                             | 3.46454  | 0.3453   |
| 29          | H    | -0.24086                            | 3.31933  | -1.39543 |
| 30          | H    | 3.38753                             | -1.63665 | 0.06507  |
| 31          | H    | 3.11055                             | -0.74926 | -1.4357  |
| 32          | H    | 3.66712                             | 1.40068  | -0.25423 |
| 33          | H    | 5.80805                             | -0.77234 | 0.08548  |
| 34          | H    | 6.09008                             | 0.98414  | 0.04508  |
| 35          | H    | 5.49905                             | 0.14172  | -1.40388 |
| 36          | H    | 4.28003                             | -0.19398 | 1.99469  |

| Conformer D |      | Standard Orientation<br>(Ångstroms) |          |          |
|-------------|------|-------------------------------------|----------|----------|
| number      | Atom | X                                   | Y        | Z        |
| 1           | C    | -3.46064                            | -0.08183 | 0.26234  |
| 2           | C    | -3.18112                            | 1.28328  | 0.21449  |
| 3           | C    | -1.89994                            | 1.8123   | -0.03078 |
| 4           | C    | -0.84385                            | 0.91513  | -0.21485 |
| 5           | C    | -1.08464                            | -0.47965 | -0.16915 |
| 6           | C    | -2.39487                            | -0.97476 | 0.04901  |
| 7           | C    | 0.56636                             | 1.37054  | -0.50664 |
| 8           | C    | 1.58333                             | 0.37071  | 0.02554  |
| 9           | O    | 1.27289                             | -0.97546 | -0.4679  |
| 10          | C    | 0.01199                             | -1.42898 | -0.40139 |
| 11          | O    | -2.67433                            | -2.3007  | 0.06206  |
| 12          | C    | -4.85178                            | -0.60738 | 0.51272  |
| 13          | C    | -1.69802                            | 3.31061  | -0.09544 |
| 14          | O    | -0.16412                            | -2.64452 | -0.56371 |
| 15          | C    | 3.01357                             | 0.67811  | -0.39792 |
| 16          | C    | 4.08603                             | -0.26984 | 0.15088  |
| 17          | C    | 4.23546                             | -0.22569 | 1.67154  |
| 18          | O    | 5.30898                             | 0.14259  | -0.49578 |
| 19          | H    | -4.00461                            | 1.9782   | 0.36858  |
| 20          | H    | 0.70675                             | 1.5006   | -1.59039 |
| 21          | H    | 0.76636                             | 2.34204  | -0.04469 |
| 22          | H    | 1.50196                             | 0.31813  | 1.11773  |
| 23          | H    | -1.83884                            | -2.77701 | -0.17554 |
| 24          | H    | -5.20539                            | -1.21896 | -0.3266  |
| 25          | H    | -5.55674                            | 0.21706  | 0.65606  |
| 26          | H    | -4.88462                            | -1.2456  | 1.40438  |
| 27          | H    | -2.65101                            | 3.83389  | 0.02945  |
| 28          | H    | -1.01993                            | 3.66795  | 0.69052  |
| 29          | H    | -1.27028                            | 3.62383  | -1.05599 |
| 30          | H    | 3.06744                             | 0.66767  | -1.49357 |
| 31          | H    | 3.24666                             | 1.7002   | -0.07133 |
| 32          | H    | 3.85285                             | -1.29618 | -0.16237 |
| 33          | H    | 4.44346                             | 0.79596  | 2.01204  |
| 34          | H    | 5.06034                             | -0.87246 | 1.99453  |
| 35          | H    | 3.32859                             | -0.58338 | 2.17279  |
| 36          | H    | 6.01843                             | -0.46265 | -0.2251  |
